# Supplementary material
Source: Royal Society of Chemistry journal article supplement (doi:10.1039/d6nr01558a)
Supplement: d6nr01558a1.pdf [file d6nr01558a1.pdf]

# Supporting Information

## **High-Stability AgNWs/Gum Arabic Composite Electrodes for Flexible Organic Light-Emitting Devices**

*Xu Wang, Xunxun Xiang, Xiao Liu, Yuehua Chen\*, Wenyong Lai, Xinwen Zhang\**

*State Key Laboratory of Flexible Electronics & Institute of Advanced Materials, Nanjing University of Posts & Telecommunications, Nanjing 210023, China.*

*E-mail: iamyhchen@njupt.edu.cn, iamxwzhang@njupt.edu.cn*

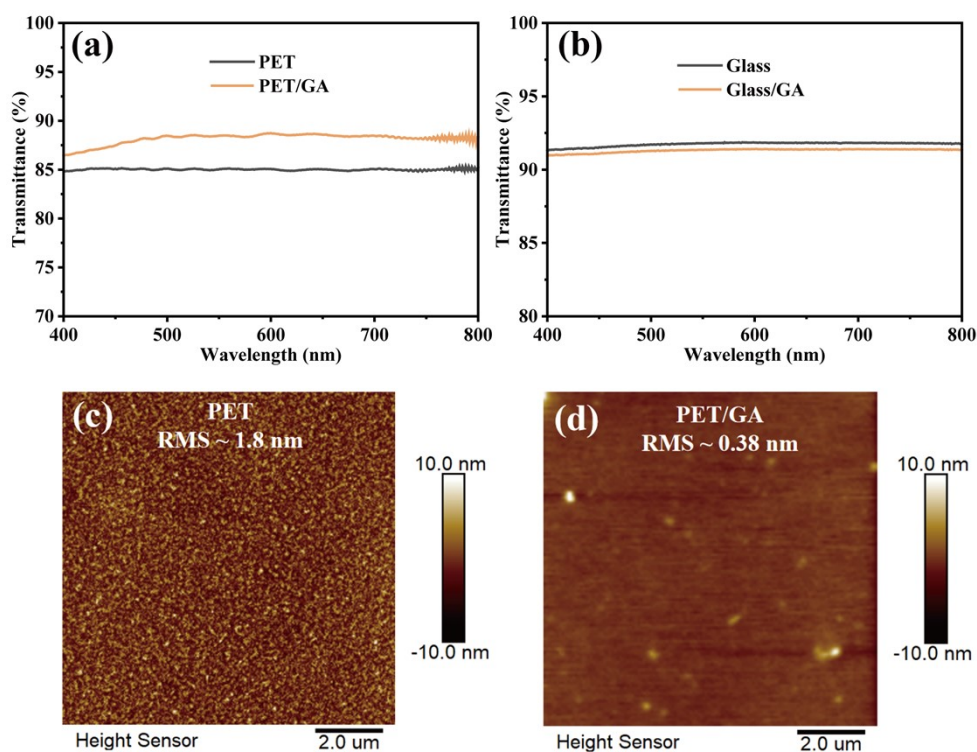

**Fig. S1.** (a) Transmittance of PET and PET/GA. (b) Transmittance of Glass and Glass/GA. AFM images of (c) PET and (d) PET/GA.

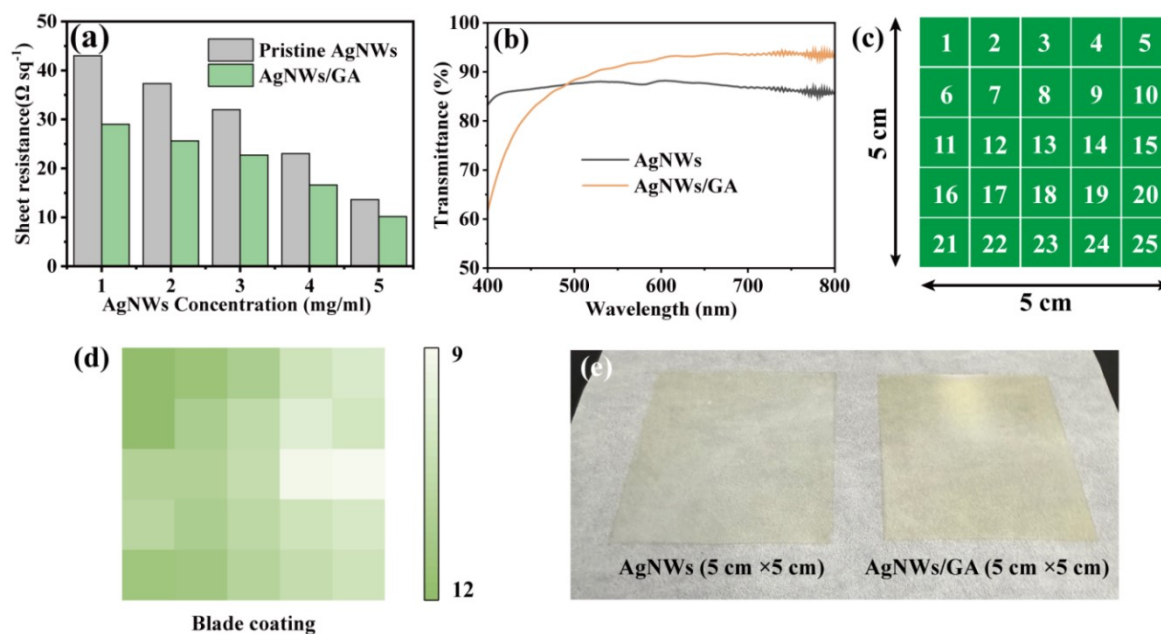

**Fig. S2.** (a) Variations in  $R_{sh}$  of pristine AgNWs electrodes with varied initial  $R_{sh}$  after GA (80 mg/mL) modification. (b) Transparency of pristine AgNWs and AgNWs/GA electrodes (5 cm×5 cm). (c) 25 regions of 5 cm×5 cm AgNWs/GA electrode. (d) Heat map image of the resistance distribution. (e) Photograph of large-area electrodes.

**Table S1.** Comparison of the optoelectrical properties of our electrode with other reported AgNW-based electrodes

| Electrodes                                          | $T_{550\text{nm}}$ (%) | $R_{\text{sh}}$ ( $\Omega/\text{sq}$ ) | FoM   | Ref       |
|-----------------------------------------------------|------------------------|----------------------------------------|-------|-----------|
| AgNWs/Chi                                           | 90.0                   | 11.4                                   | 305.6 | 1         |
| AgNWs/GO                                            | 83.5                   | 11.9                                   | 167.9 | 2         |
| AgNW/ZnO                                            | 88                     | 10                                     | 286.1 | 3         |
| AgNWs/MOF                                           | 95.1                   | 25.8                                   | 266.9 | 4         |
| AgNW/TiO <sub>2</sub>                               | 85.6                   | 13.2                                   | 178.3 | 5         |
| AgNWs/AZO-SG                                        | 95                     | 18                                     | 498   | 6         |
| AgNWs/Propolis                                      | 93.0                   | 15                                     | 341.5 | 7         |
| AgNWs/Ti <sub>3</sub> C <sub>2</sub> T <sub>x</sub> | 95.0                   | 15                                     | 485.8 | 8         |
| AgNWs/Mxene                                         | 92.5                   | 15.9                                   | 298.2 | 9         |
| AgNWs/GA                                            | 98.3                   | 22                                     | 1013  | This work |

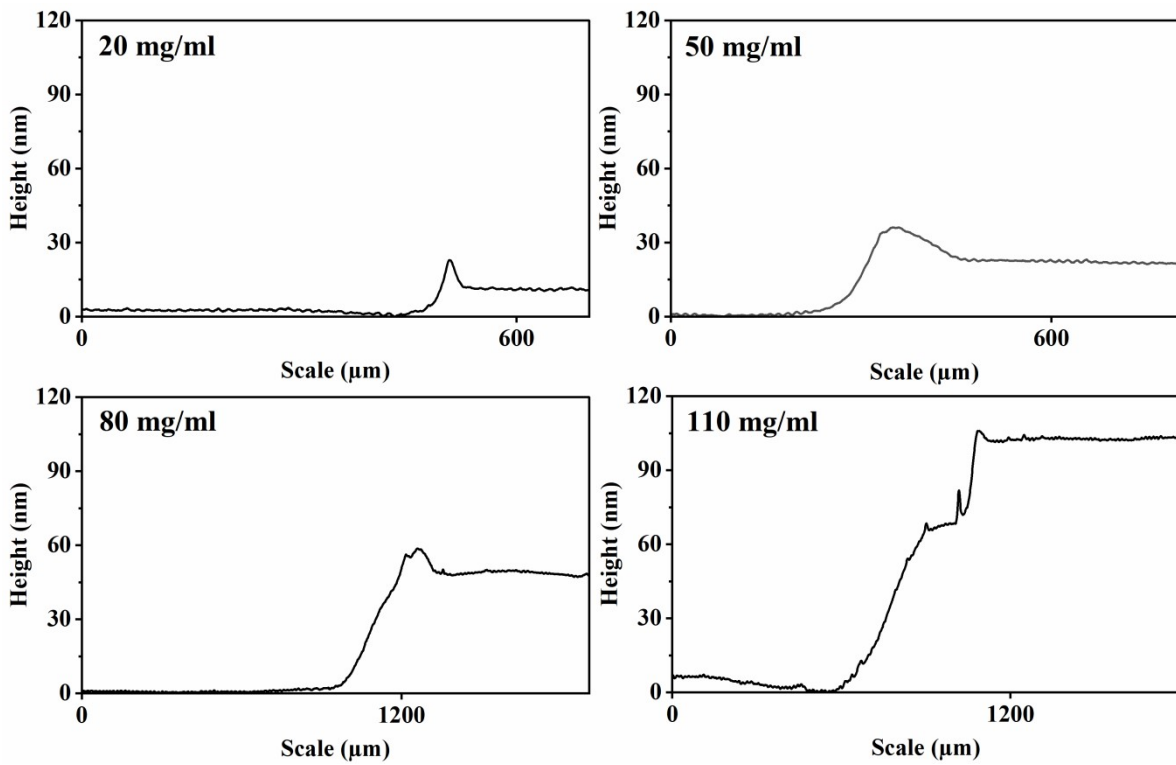

**Fig. S3.** Profile curves of GA films spin-coated from different concentration solutions.

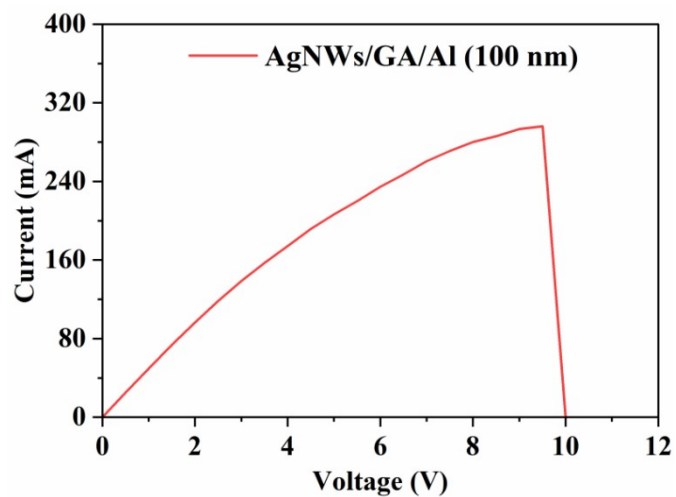

**Fig. S4.** Current -voltage characteristic curve of AgNWs/GA/Al.

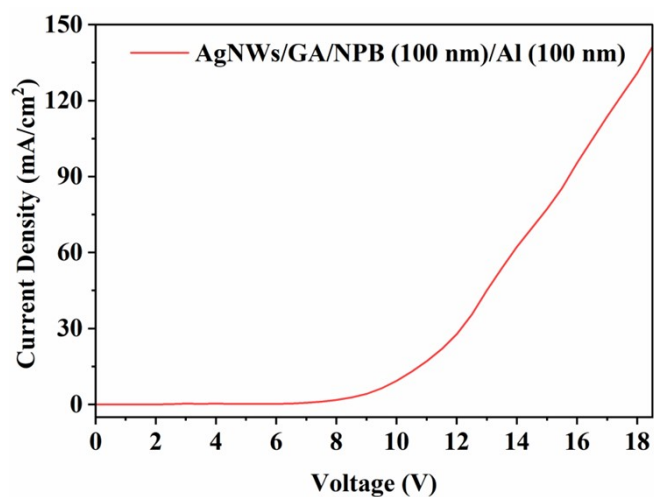

**Fig. S5.** Current density-voltage characteristic curve of the hole-only device.

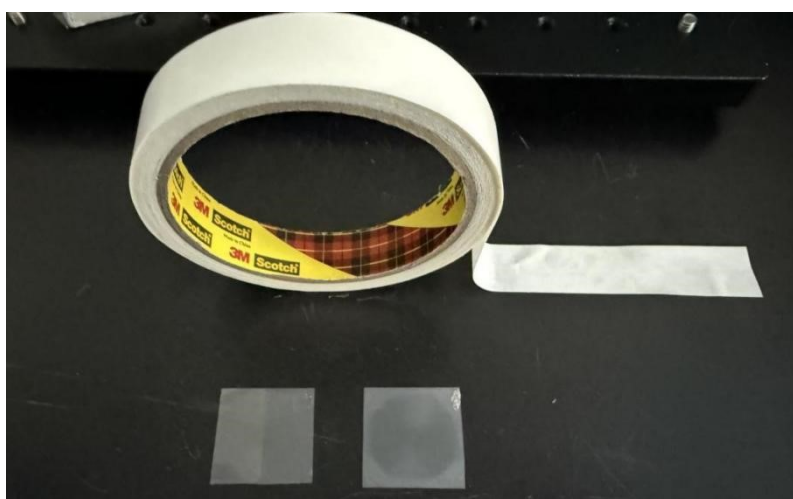

**Fig. S6.** 3M tape tests of electrodes (left: pristine AgNWs electrode; right: AgNWs/GA composite electrode).

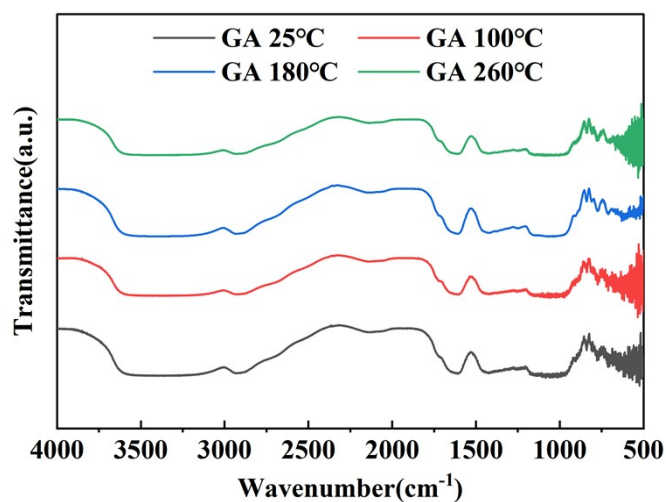

**Fig. S7.** FTIR spectra of the GA film after heating at different temperatures.

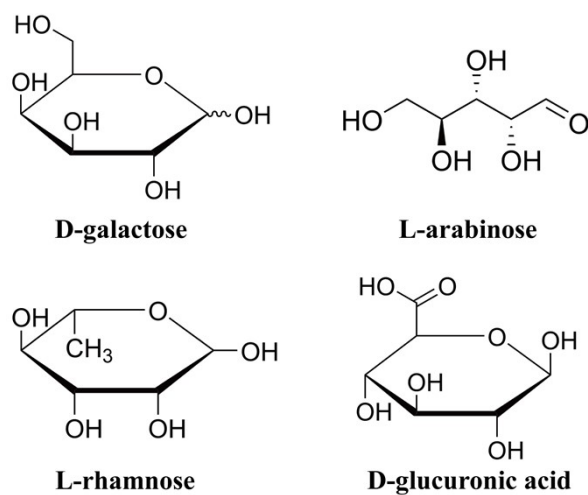

**Fig. S8.** Chemical structures of the main monosaccharides in GA

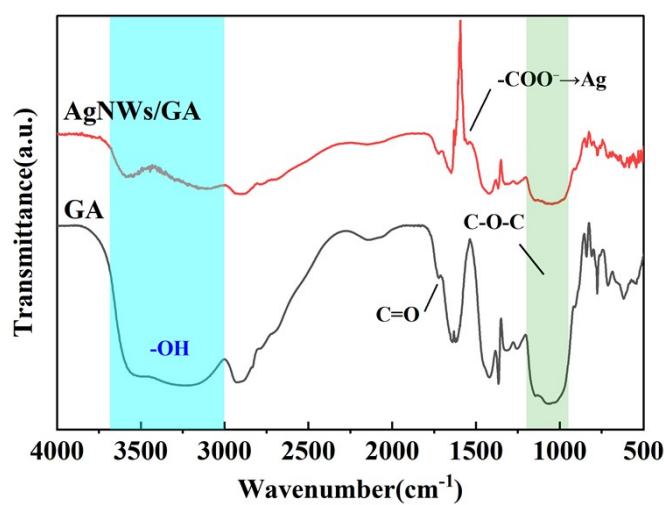

**Fig. S9.** FTIR spectra of GA and AgNWs/GA.

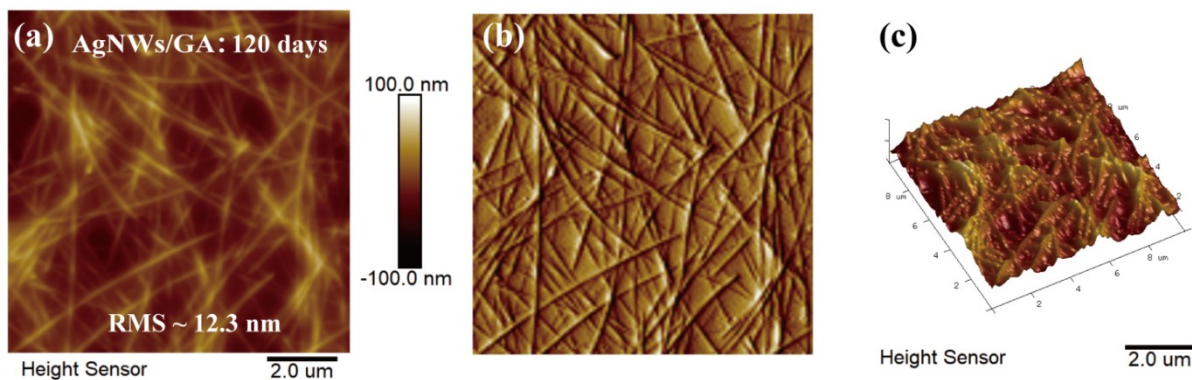

**Fig. S10.** AFM images of the AgNWs/GA electrode after being stored for 120 days at  $\sim 80$  °C and  $\sim 80\%$  relative humidity.

#### Reference:

1. Y. X. Jin, K. Q. Wang, Y. R. Cheng, Q. B. Pei, Y. X. Xu and F. Xiao, *ACS Applied Materials & Interfaces*, 2017, 9, 4733-4741.
2. I. K. Moon, J. I. Kim, H. Lee, K. Hur, W. C. Kim and H. Lee, *Scientific Reports*, 2013, 3, 1112.
3. W. Lan, Z. W. Yang, Y. Zhang, Y. P. Wei, P. X. Wang, A. Abas, G. M. Tang, X. T. Zhang, J. Y. Wang and E. Q. Xie, *Applied Surface Science*, 2018, 433, 821-828.
4. Y. Zhao, W. Huang, J. Kang, X. Xi, Y. Pei and G. He, *ACS Applied Materials & Interfaces*, 2023, 15, 35366-35379.
5. T. B. Song, Y. S. Rim, F. M. Liu, B. Bob, S. L. Ye, Y. T. Hsieh and Y. Yang, *ACS Applied Materials & Interfaces*, 2015, 7, 24601-24607.
6. X. Chen, G. Xu, G. Zeng, H. Gu, H. Chen, H. Xu, H. Yao, Y. Li, J. Hou and Y. Li, *Advanced Materials*, 2020, 32, 1908478.
7. Y. Qin, L. Yao, F. Zhang, R. Li, Y. Chen, Y. Chen, T. Cheng, W. Lai, B. Mi, X. Zhang and W. Huang, *ACS Applied Materials & Interfaces*, 2022, 14, 38021-38030.
8. Z. Ju, Y. Chen, P. Li, J. Ma, H. Xu, Y. Liu and P. Samorì, *Advanced Materials*, 2024, 36, 2412512.
9. J. Liu, L. Zhang and C. Li, *Industrial & Engineering Chemistry Research*, 2019, 58, 21485-21492.
